# Supplementary material for: Ultrasound-Assisted Wittig Reaction for the Synthesis of 3-Substituted 4-Chloroquinolines and Quinolin-4(1H)-ones with Extended π-Conjugated Systems
Source: Hindawi journal article supplement (doi:10.1155/2022/4807767), 2022-12-05
Supplement: f1 [file 4807767.f1.docx]

**SUPPORTING INFORMATION**

Ultrasounds-Assisted Wittig Reaction for the Synthesis of
3-Substituted 4-Chloroquinolines and Quinolin-4(1*H*)-ones with Extended π-Conjugated Systems

**Wahiba Frites,1 Massaab Khalfaoui,1 Lamouri Hammal,1 Vera L. M. Silva*,2 and Artur M. S. Silva*,2**

*1Laboratory of Applied Organic Chemistry (LCOA) Faculty of Chemistry, U.S.T.H.B.
BP 32 EL-Alia, Bab-Ezzouar, 16111 Algiers, Algeria*

*2LAQV-REQUIMTE & Department of Chemistry, University of Aveiro, 3810-193 Aveiro, Portugal*

**Table of Contents**

1. **NMR spectra...........................................................................................4**

**Figure S1.** 1H NMR spectrum of compound **1** (300.13 MHz, CDCl3)…………………………..4

**Figure S2.** Expansion of the 1H NMR spectrum of compound **1** (300.13 MHz, CDCl3)……….4

**Figure S3.** 13C NMR spectrum of compound **1** (75.47 MHz, CDCl3)…………………………...5

**Figure S4.** 1H NMR spectrum of compound **2a** (300.13 MHz, DMSO-d6)……………………..5

**Figure S5.** Expansion of the 1H NMR spectrum of compound **2a** (300.13 MHz, DMSO-d6)…..6

**Figure S6.** 13C NMR spectrum of compound **2a** (75.47 MHz, DMSO-d6)……………………...6

**Figure S7.** Expansion of the 13C NMR spectrum of compound **2a** (75.47 MHz, DMSO-d6)…...7

**Figure S8.** 1H NMR spectrum of compound **2b** (300.13 MHz, CDCl3)…………………………7

**Figure S9.** Expansion of the 1H NMR spectrum of compound **2b** (300.13 MHz, CDCl3)………8

**Figure S10.** 13C NMR spectrum of compound **2b** (75.47 MHz, CDCl3)………………………...8

**Figure S11.** 1H NMR spectrum of compound **5a** (300.13 MHz, CDCl3)………………………..9

**Figure S12.** Expansion of the 1H NMR spectrum of compound **5a** (300.13 MHz, CDCl3)……..9

**Figure S13.** 13C NMR spectrum of compound **5a** (75.47 MHz, CDCl3)……………………….10

**Figure S14.** Expansion of the 13C NMR spectrum of compound **5a** (75.47 MHz, CDCl3)…….10

**Figure S15.** 1H NMR spectrum of compound **5b** (300.13 MHz, CDCl3)………………………11

**Figure S16.** Expansion of the 1H NMR spectrum of compound **5b** (300.13 MHz, CDCl3)……11

**Figure S17.** 13C NMR spectrum of compound **5b** (75.47 MHz, CDCl3)……………………….12

**Figure S18.** 1H NMR spectrum of compound **6b** (500.16 MHz, CDCl3)……………………....12

**Figure S19.** Expansion of the 1H NMR spectrum of compound **6b** (500.16 MHz, CDCl3)……13

**Figure S20.** 13C NMR spectrum of compound **6b** (125.77 MHz, CDCl3)……………………...13

**Figure S21.** 1H NMR spectrum of compound **5c** (300.13 MHz, CDCl3)………………………14

**Figure S22.** Expansion of the 1H NMR spectrum of compound **5c** (300.13 MHz, CDCl3)……14

**Figure S23.** 13C NMR spectrum of compound **5c** (75.47 MHz, CDCl3)……………………….15

**Figure S24.**  Expansion of the 13C NMR spectrum of compound **5c** (75.47 MHz, CDCl3)……15

**Figure S25.** 1H NMR spectrum of compound **6c** (300.13 MHz, CDCl3)……………………....16

**Figure S26.** Expansion of the 1H NMR spectrum of compound **6c** (300.13 MHz, CDCl3)…....16

**Figure S27.** 13C NMR spectrum of compound **6c** (75.47 MHz, CDCl3)……………………….17

**Figure S28.** Expansion of the 13C NMR spectrum of compound **6c** (75.47 MHz, CDCl3)…….17

**Figure S29.** 1H NMR spectrum of compound **7a** (300.13 MHz, CD3OD)……………………..18

**Figure S30.** Expansion of the 1H NMR spectrum of compound **7a** (300.13 MHz, CD3OD)..…18

**Figure S31.** 13C NMR spectrum of compound **7a** (75.47 MHz, CD3OD)……………………...19

**Figure S32.** 1H NMR spectrum of compound **7b** (300.13 MHz, CDCl3)………………………19

**Figure S33.** 13C NMR spectrum of compound **7b** (75.47 MHz, CDCl3)……………………….20

**Figure S34.** NOESY spectrum of compound **7b**……………………………………………….20

**Figure S35.** 1H NMR spectrum of compound **7c** (300.13 MHz, CD3OD)……………………..21

**Figure S36.** Expansion of the1H NMR spectrum of compound **7c** (300.13 MHz, CD3OD)…..21

**Figure S37.** 13C NMR spectrum of compound **7c** (75.47 MHz, CD3OD)……………………...22

**Figure S38.** 1H NMR spectrum of compound **8d** (300.13 MHz, CDCl3)……………………....22

**Figure S39.** 13C NMR spectrum of compound **8d** (75.47 MHz, CDCl3)…………………….....23

**Figure S40.** 1H NMR spectrum of compound **7e** (300.13 MHz, CDCl3)………………………23

**Figure S41.** Expansion of the 1H NMR spectrum of compound **7e** (300.13 MHz, CDCl3)……24

**Figure S42.** 13C NMR spectrum of compound **7e** (75.47 MHz, CDCl3)……………………….24

**Figure S43.** NOESY spectrum of compound **7e** ……………………..………………………...25

**Figure S44.** 1H NMR spectrum of compound **8f** (300.13 MHz, DMSO-d6)…………………..25

**Figure S45.** Expansion of the 1H NMR spectrum of compound **8f** (300.13 MHz, DMSO-d6)..26

**Figure S46.** 13C NMR spectrum of compound **8f** (75.47 MHz, DMSO-d6)…………………...26

**Figure S47.** Expansion of the 13C NMR spectrum of compound **8f** (75.47 MHz, DMSO-d6)...27

**Figure S48.** 1H NMR spectrum of compound **7g** (300.13 MHz CDCl3)……………………….27

**Figure S49.** Expansion of the 1H NMR spectrum of compound **7g** (300.13 MHz CDCl3)……28

**Figure S50.** 13C NMR spectrum of compound **7g** (75.47 MHz CDCl3)………………………..28

**Figure S51.** Expansion of the 13C NMR spectrum of compound **7g** (75.47 MHz, CDCl3)…….29

**Figure S52.** NOESY spectrum of compound **7g**……………………………………………….29

**Figure S53.** 1H NMR spectrum of compound **11a** (300.13 MHz, CDCl3)……………………..30

**Figure S54.** Expansion of the 1H NMR spectrum of compound **11a** (300.13 MHz, CDCl3)…..30

**Figure S55.** 13C NMR spectrum of compound **11a** (75.47 MHz, CDCl3)……………………...31

**Figure S56.** Expansion of the 13C NMR spectrum of compound **11a** (75.47 MHz, CDCl3)…...31

**Figure S57.** 1H NMR spectrum of compound **12b** (500.13 MHz, CDCl3)……………………..32

**Figure S58.** 13C NMR spectrum of compound **12b** (125.77 MHz, CDCl3)…………………….32

**Figure S59.** 1H NMR spectrum of compound **14** (300.13 MHz, CDCl3)………………………33

**Figure S60.** Expansion of the 1H NMR spectrum of compound **14** (300.13 MHz, CDCl3)……33

**Figure S61.** 13C NMR spectrum of compound **14** (75.47 MHz, CDCl3)……………………….34

**Figure S62.** HSQC spectrum of compound **14**…………………………………………………34

**Figure S63.** HMBC spectrum of compound **14**………………………………………………...35

1. **NMR spectra**

**4-Chloroquinoline-3-carbaldehyde (1)**

**Figure S1.** 1H NMR spectrum of compound **1** (300.13 MHz, CDCl3).

**Figure S2.** Expansion of the 1H NMR spectrum of compound **1** (300.13 MHz, CDCl3).

**Figure S3.** 13C NMR spectrum of compound **1** (75.47 MHz, CDCl3).

**4-Oxo-1,4-dihydroquinoline-3-carbaldehyde (2a)**

**Figure S4.** 1H NMR spectrum of compound **2a** (300.13 MHz, DMSO-d6).

**Figure S5.** Expansion of the 1H NMR spectrum of compound **2a** (300.13 MHz, DMSO-d6).

**Figure S6.** 13C NMR spectrum of compound **2a** (75.47 MHz, DMSO-d6).


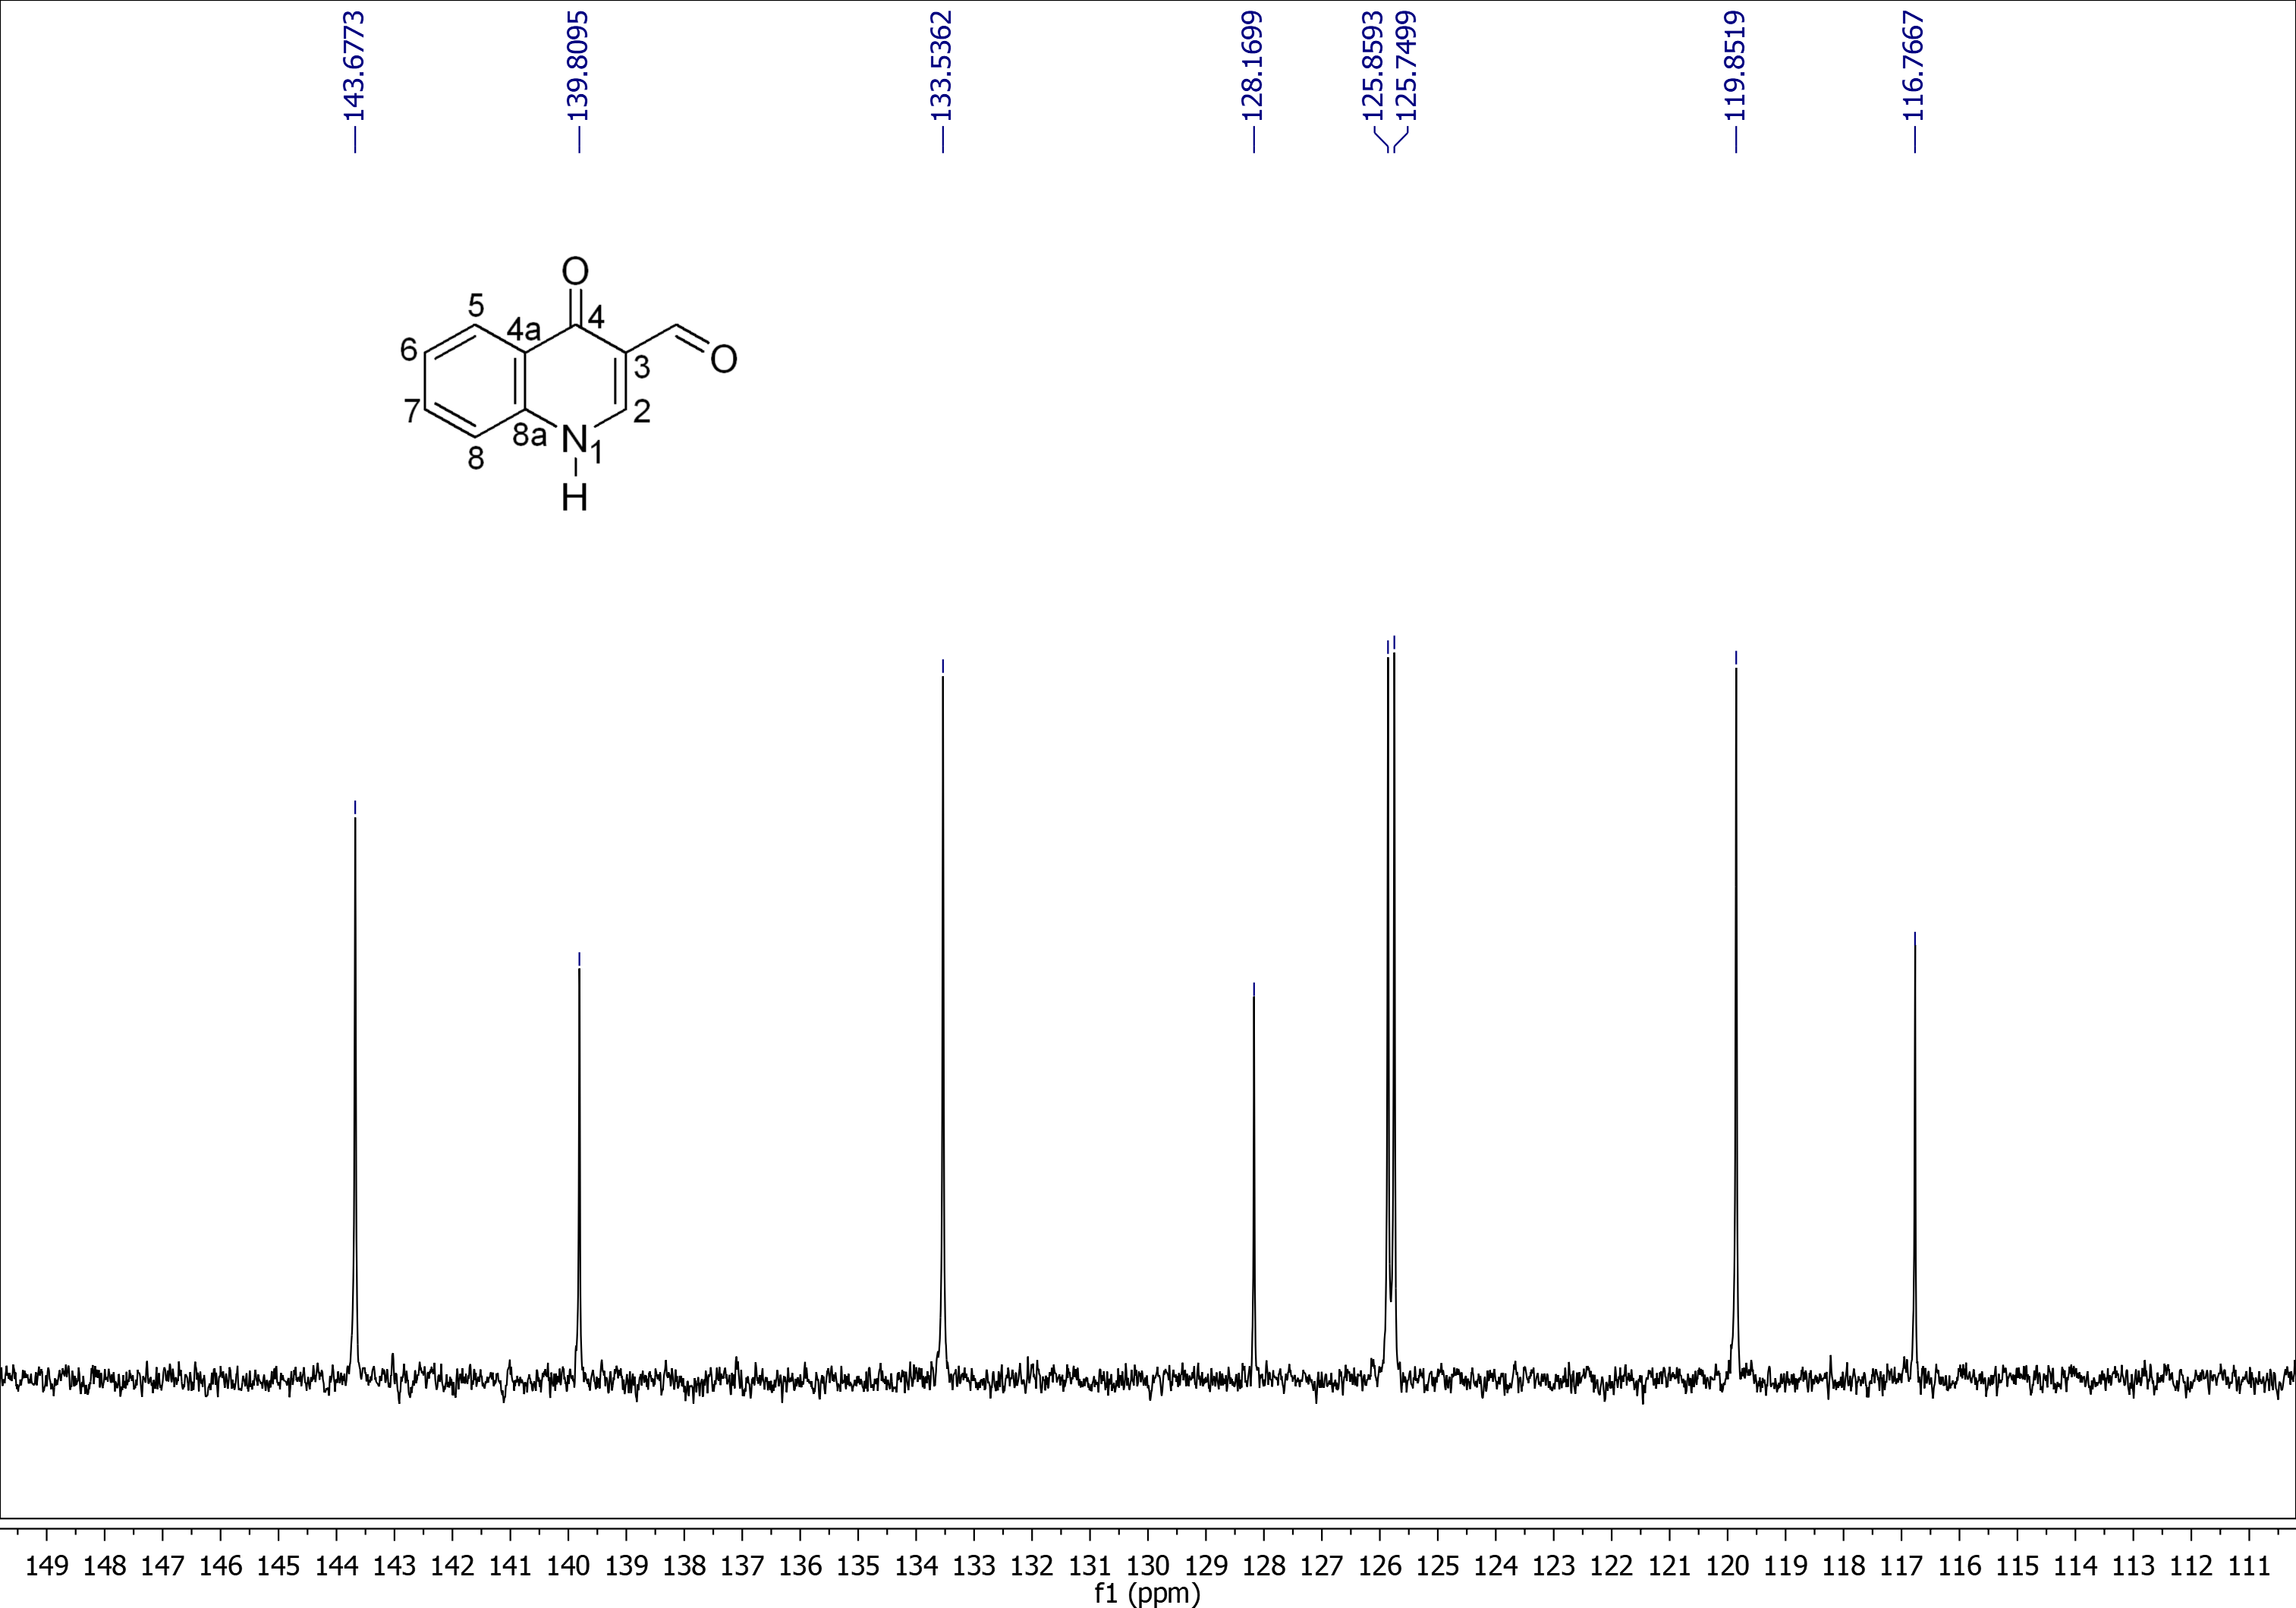


**Figure S7.** Expansion of the 13C NMR spectrum of compound **2a** (75.47 MHz, DMSO-d6).

**1-Methyl-4-oxo-1,4-dihydroquinoline-3-carbaldehyde (2b)**

**Figure S8.** 1H NMR spectrum of compound **2b** (300.13 MHz, CDCl3).

**Figure S9.** Expansion of the 1H NMR spectrum of compound **2b** (300.13 MHz, CDCl3).

**Figure S10.** 13C NMR spectrum of compound **2b** (75.47 MHz, CDCl3).

**4-Chloro-3-vinylquinoline (5a)**

**Figure S11.** 1H NMR spectrum of compound **5a** (300.13 MHz, CDCl3).

**Figure S12.** Expansion of the 1H NMR spectrum of compound **5a** (300.13 MHz, CDCl3).

**Figure S13.** 13C NMR spectrum of compound **5a** (75.47 MHz, CDCl3).

**Figure S14.** Expansion 13C NMR spectrum of compound **5a** (75.47 MHz, CDCl3).

**(1*Z,*3*E*)-3-(Buta-1,3-dien-1-yl)-4-chloroquinoline (5b)**

**Figure S15.** 1H NMR spectrum of compound **5b** (300.13 MHz, CDCl3).

**Figure S16.** Expansion of the 1H NMR spectrum of compound **5b** (300.13 MHz, CDCl3).

**Figure S17.** 13C NMR spectrum of compound **5b** (75.47 MHz, CDCl3).

**(1*E,*3*E*)-3-(Buta-1,3-dien-1-yl)-4-chloroquinoline (6b)**

**Figure S18.** 1H NMR spectrum of compound **6b** (500.16 MHz, CDCl3).

**Figure S19.** Expansion of the 1H NMR spectrum of compound **6b** (500.16 MHz, CDCl3).

**Figure S20.** 13C NMR spectrum of compound **6b** (125.77 MHz, CDCl3)

**(1*Z*,3*E*)-4-Chloro-3-(4-phenylbuta-1,3-dien-1-yl)quinoline (5c)**

**Figure S21.** 1H NMR spectrum of compound **5c** (300.13 MHz, CDCl3).

**Figure S22.** Expansion of the 1H NMR spectrum of compound **5c** (300.13 MHz, CDCl3).

**Figure S23.** 13C NMR spectrum of compound **5c** (75.47 MHz, CDCl3).

**Figure S24.**  Expansion of the 13C NMR spectrum of compound **5c** (75.47 MHz, CDCl3).

**(1*E*,3*E*)-4-Chloro-3-(4-phenylbuta-1,3-dien-1-yl)quinoline (6c)**

**Figure S25.** 1H NMR spectrum of compound **6c** (300.13 MHz, CDCl3).

**Figure S26.** Expansion of the 1H NMR spectrum of compound **6c** (300.13 MHz, CDCl3).

**Figure S27.** 13C NMR spectrum of compound **6c** (75.47 MHz, CDCl3).

**Figure S28.** Expansion 13C NMR spectrum of compound **6c** (75.47 MHz, CDCl3).

**3-Vinylquinolin-4(1*H*)-one (7a)**

**Figure S29.** 1H NMR spectrum of compound **7a** (300.13 MHz, CD3OD).

**Figure S30.** Expansion of the 1H NMR spectrum of compound **7a** (300.13 MHz, CD3OD).

**Figure S31.** 13C NMR spectrum of compound **7a** (75.47 MHz, CD3OD).

**1-Methyl-3-vinylquinolin-4(1*H*)-one (7b)**

**Figure S32.** 1H NMR spectrum of compound **7b** (300.13 MHz, CDCl3).

**Figure S33.** 13C NMR spectrum of compound **7b** (75.47 MHz, CDCl3).

**Figure S34.** NOESY spectrum of compound **7b**.

**6-Methoxy-3-vinylquinolin-4(1*H*)-one (7c)**

**Figure S35.** 1H NMR spectrum of compound **7c** (300.13 MHz, CD3OD).

**Figure S36.** Expansion of the1H NMR spectrum of compound **7c** (300.13 MHz, CD3OD).

**Figure S37.** 13C NMR spectrum of compound **7c** (75.47 MHz, CD3OD).

**(1*E,*3*E*)-3-(Buta-1,3-dien-1-yl)quinolin-4(1*H*)-one (8d)**

**Figure S38.** 1H NMR spectrum of compound **8d** (300.13 MHz, CDCl3).*

*The spectrum shows contamination with the phosphine oxide formed in the reaction.

**Figure 39.** 13C NMR spectrum of compound **8d** (75.47 MHz, CDCl3).*

*The spectrum shows contamination with the phosphine oxide formed in the reaction.

**(1Z,3*E*)-3-(Buta-1,3-dien-1-yl)-1-methylquinolin-4(1*H*)-one (7e)**

**Figure S40.** 1H NMR spectrum of compound **7e** (300.13 MHz, CDCl3).

**Figure S41.** Expansion of the 1H NMR spectrum of compound **7e** (300.13 MHz, CDCl3).

**Figure S42.** 13C NMR spectrum of compound **7e** (75.47 MHz, CDCl3).

**Figure S43.** NOESY spectrum of compound **7e** .

**3-[(1*E*,3*E*)-4-Phenylbuta-1,3-dien-1-yl]quinolin-4(1*H*)-one (8f)**

**Figure S44.** 1H NMR spectrum of compound **8f** (300.13 MHz, DMSO-d6).

**Figure S45.** Expansion of the 1H NMR spectrum of compound **8f** (300.13 MHz, DMSO-d6).

**Figure S46.** 13C NMR spectrum of compound **8f** (75.47 MHz, DMSO-d6).

**Figure S47.** Expansion of the 13C NMR spectrum of compound **8f** (75.47 MHz, DMSO-d6).

**(1*Z*,3*E*)- 1-Methyl-3-(4-phenylbuta-1,3-dien-1-yl)quinolin-4(1*H*)-one (7g)**

**Figure S48.** 1H NMR spectrum of compound **7g** (300.13 MHz CDCl3).

**Figure S49.** Expansion of the 1H NMR spectrum of compound **7g** (300.13 MHz CDCl3).

**Figure S50.** 13C NMR spectrum of compound **7g** (75.47 MHz CDCl3).

**Figure S51.** Expansion of the 13C NMR spectrum of compound **7g** (75.47 MHz CDCl3).

**Figure S52.** NOESY spectrum of compound **7g**.

**2-Methyl-1*H*-pyrrolo[3,4-*c*]acridine-1,3,6(2*H*,11*H*)-trione (11a)**

**Figure S53.** 1H NMR spectrum of compound **11a** (300.13 MHz, CDCl3).

**Figure S54.** Expansion of the 1H NMR spectrum of compound **11a** (300.13 MHz, CDCl3).

**Figure S55.** 13C NMR spectrum of compound **11a** (75.47 MHz, CDCl3).

**Figure S56.** Expansion of the 13C NMR spectrum of compound **11a** (75.47 MHz, CDCl3).

**2,11-Dimethyl-1*H*-pyrrolo[3,4-*c*]acridine-1,3,6(2*H*,11*H*)-trione (11b)**

**Figure S57.** 1H NMR spectrum of compound **11b** (500.13 MHz, CDCl3).

**Figure S58.** 13C NMR spectrum of compound **11b** (125.77 MHz, CDCl3).

**Figure S59.** 1H NMR spectrum of compound **14** (300.13 MHz, CDCl3).

**Figure S60.** Expansion of the 1H NMR spectrum of compound **14** (300.13 MHz, CDCl3).

**Figure S61.** 13C NMR spectrum of compound **14** (75.47 MHz, CDCl3).

**Figure S62.** HSQC spectrum of compound **14**.

**Figure S63.** HMBC spectrum of compound **14**.
